# Supplementary material
Source: PubMed Central journal article supplement (PMC8184631)
Supplement: NIHMS1696754-supplement-1.pdf [file NIHMS1696754-supplement-1.pdf]

**Supplemental Table 1. Ophthalmic Data Coverage in the *All of Us* Research Program.**  
 Number of participants with available data among all participants with SNOMED codes related to glaucoma (n=6665).

| Data Element                        | Codes (Vocabulary)                                                | Count (%)                 |
|-------------------------------------|-------------------------------------------------------------------|---------------------------|
| Visual acuity screening             | 99173, 99172 (CPT4); 16830007 (SNOMED); 4A07X0Z (ICD10PCS)        | 86 (1.29%)                |
| Color vision examination            | 92283 (CPT4)                                                      | Less than 20 <sup>a</sup> |
| Corneal pachymetry                  | 497861000119107, 410456003 (SNOMED)                               | 37 (0.56%)                |
| Intraocular pressure                | 56844-4 (LOINC)                                                   | Less than 20 <sup>a</sup> |
| Gonioscopy                          | 92020 (CPT4); 76949005 (SNOMED)                                   | 1604 (24.07%)             |
| Anterior segment imaging/ultrasound | 92286, 92132, 76513 (CPT4)                                        | 157 (2.36%)               |
| Dilated fundus exam/ophthalmoscopy  | 92225, 92226, 2021F, 5010F (CPT4); 274798009, 53524009 (SNOMED)   | 889 (13.34%)              |
| Visual fields                       | 92083, 92082, 92081 (CPT4); 86944008, 24985005, 21862007 (SNOMED) | 2912 (43.69%)             |
| Optical coherence tomography        | 392010000 (SNOMED)                                                | 97 (1.46%)                |

<sup>a</sup>Participant counts under 20 (and associated proportions) cannot be reported based on de-identification protocols and policies delineated by the *All of Us* Research Program.
