# Supplementary material
Source: PubMed Central journal article supplement (PMC8184631)
Supplement: NIHMS1696754-supplement-2.pdf [file NIHMS1696754-supplement-2.pdf]

**Supplemental Table 2. Relative contribution of various predictor variables in the multivariable logistic regression model predicting need for surgical intervention within 6 months among patients with primary open-angle glaucoma derived from a single academic center.<sup>a</sup>**

| <b>Variable</b>                            | <b>Adjusted Odds Ratio<br/>(95% Confidence Interval)</b> | <b>P-Value</b> |
|--------------------------------------------|----------------------------------------------------------|----------------|
| Ophthalmic medication                      | 0.28 (0.17, 0.46)                                        | <0.001         |
| Minimum systolic blood pressure            | 0.92 (0.89, 0.95)                                        | <0.001         |
| Mean systolic blood pressure               | 1.09 (1.06, 1.13)                                        | <0.001         |
| Non-opioid analgesic medication            | 0.21 (0.07, 0.52)                                        | 0.002          |
| Anti-hyperlipidemic medication             | 0.39 (0.21, 0.73)                                        | 0.004          |
| Days of contact with the healthcare system | 0.97 (0.94, 0.99)                                        | 0.006          |
| Calcium blocker medication                 | 0.43 (0.21, 0.89)                                        | 0.025          |
| Macrolide antibiotic medication            | 0.40 (0.17, 0.93)                                        | 0.034          |
| Anticoagulant medication                   | 2.75 (1.05, 7.46)                                        | 0.042          |
| Male gender                                | 1.52 (0.94, 2.47)                                        | 0.089          |
| Cold/cough medication                      | 2.22 (0.83, 6.06)                                        | 0.115          |
| Minimum diastolic blood pressure           | 0.98 (0.95, 1.01)                                        | 0.117          |
| Dementia                                   | 0.26 (0.04, 1.38)                                        | 0.141          |
| Antidepressant medication                  | 0.56 (0.50, 1.21)                                        | 0.143          |
| Metastatic disease                         | 0.31 (0.06, 1.43)                                        | 0.149          |

<sup>a</sup>These results were previously published in Baxter SL, Marks C, Kuo TT, Ohno-Machado L, Weinreb RN. Machine Learning-Based Predictive Modeling of Surgical Intervention in Glaucoma Using Systemic Data From Electronic Health Records. *Am J Ophthalmol.* 2019 Dec;208:30-40. doi: 10.1016/j.ajo.2019.07.005. Epub 2019 Jul 16. PMID: 31323204; PMCID: PMC6888922.
