# Supplementary material
Source: PubMed Central journal article supplement (PMC8184631)
Supplement: NIHMS1696754-supplement-3.pdf [file NIHMS1696754-supplement-3.pdf]

**Supplemental Table 3. Relative contribution of various predictor variables in the multivariable logistic regression model predicting need for surgical intervention within 6 months among patients with primary open-angle glaucoma in *All of Us*.**

| <b>Variable</b>                            | <b>Adjusted Odds Ratio<br/>(95% Confidence Interval)</b> | <b>P-Value</b> |
|--------------------------------------------|----------------------------------------------------------|----------------|
| Days of contact with the healthcare system | 0.99 (0.98, 0.99)                                        | 0.001          |
| Mean heart rate                            | 1.05 (1.02, 1.08)                                        | 0.001          |
| White race                                 | 2.44 (1.30, 4.57)                                        | 0.005          |
| Diabetes mellitus                          | 0.48 (0.29, 0.80)                                        | 0.005          |
| Black race                                 | 2.21 (1.19, 4.12)                                        | 0.01           |
| Ophthalmic medication                      | 1.63 (1.08, 2.47)                                        | 0.02           |
| Minimum systolic blood pressure            | 0.99 (0.98, 1.00)                                        | 0.10           |
| Minimum heart rate                         | 0.98 (0.97, 1.00)                                        | 0.11           |
| HIV                                        | 0.17 (0.02, 1.55)                                        | 0.12           |
| Anticonvulsant medication                  | 1.58 (0.89, 2.78)                                        | 0.12           |
| Macrolide antibiotics                      | 2.07 (0.81, 5.33)                                        | 0.13           |
| Laxative medication                        | 0.66 (0.37, 1.18)                                        | 0.16           |
| Antidiabetic medication                    | 1.61 (0.82, 3.17)                                        | 0.17           |
| Height                                     | 0.99 (0.97, 1.01)                                        | 0.18           |
| Maximum diastolic blood pressure           | 0.99 (0.99, 1.00)                                        | 0.19           |
| Maximum heart rate                         | 1.00 (0.99, 1.01)                                        | 0.19           |
| Mean diastolic blood pressure              | 0.98 (0.94, 1.01)                                        | 0.22           |
| Liver disease                              | 0.71 (0.40, 1.26)                                        | 0.24           |
| Asian race                                 | 1.98 (0.57, 6.87)                                        | 0.28           |
| Beta blocker medication                    | 1.34 (0.78, 2.31)                                        | 0.29           |
| Renal disease                              | 0.78 (0.49, 1.26)                                        | 0.31           |
| Mean systolic blood pressure               | 1.01 (0.99, 1.03)                                        | 0.35           |
| Antihyperlipidemic medication              | 0.80 (0.49, 1.30)                                        | 0.36           |
| Antidepressant medication                  | 1.25 (0.74, 2.12)                                        | 0.41           |
| Age                                        | 1.01 (0.99, 1.02)                                        | 0.44           |
| Paralytic disease                          | 1.38 (0.59, 3.25)                                        | 0.46           |
| Mean hip circumference                     | 1.01 (0.98, 1.04)                                        | 0.49           |
| Dementia                                   | 0.49 (0.13, 2.80)                                        | 0.51           |
| Cough/cold medication                      | 1.23 (0.65, 2.32)                                        | 0.52           |
| Calcium channel blockers                   | 0.85 (0.49, 1.49)                                        | 0.57           |
| Anti-asthmatic medication                  | 0.86 (0.47, 1.57)                                        | 0.62           |
| Anticoagulant medication                   | 0.83 (0.39, 1.74)                                        | 0.62           |
| Congestive heart failure                   | 1.19 (0.60, 2.34)                                        | 0.62           |
| Pulmonary disease                          | 1.11 (0.70, 1.76)                                        | 0.65           |
| Peptic ulcer disease                       | 0.76 (0.22, 2.57)                                        | 0.66           |
| Mean body mass index                       | 0.99 (0.92, 1.05)                                        | 0.68           |
| Opioid medications                         | 0.89 (0.51, 1.55)                                        | 0.68           |
| Maximum systolic blood pressure            | 0.99 (0.99, 1.01)                                        | 0.68           |
| Antirheumatic medication                   | 0.90 (0.55, 1.49)                                        | 0.69           |
| Cancer                                     | 0.84 (0.34, 2.06)                                        | 0.70           |
| Myocardial infarction                      | 0.86 (0.37, 1.98)                                        | 0.72           |
| Vitamins                                   | 0.90 (0.51, 1.60)                                        | 0.72           |
| Peripheral vascular disease                | 1.11 (0.55, 2.21)                                        | 0.78           |
| Mean waist circumference                   | 1.00 (0.97, 1.02)                                        | 0.81           |
| Minimum diastolic blood pressure           | 1.00 (0.98, 1.02)                                        | 0.81           |
| Antihypertensive medication                | 1.05 (0.62, 1.79)                                        | 0.85           |
| Dermatological medication                  | 1.04 (0.65, 1.68)                                        | 0.86           |
| Mean weight                                | 1.00 (0.98, 1.03)                                        | 0.91           |
| Non-opioid analgesic medication            | 0.99 (0.58, 1.69)                                        | 0.98           |
