# Supplementary material
Source: PubMed Central journal article supplement (PMC8184631)
Supplement: NIHMS1696754-supplement-4.pdf [file NIHMS1696754-supplement-4.pdf]

**Supplemental Table 4. Relative importance of top predictor variables<sup>a</sup> in the random forests model predicting need for surgical intervention within 6 months among patients with primary open-angle glaucoma derived from *All of Us*.**

| Variable                                   | Importance |
|--------------------------------------------|------------|
| Days of contact with the healthcare system | 0.189      |
| Hip circumference                          | 0.146      |
| Waist circumference                        | 0.116      |
| Body Mass Index                            | 0.060      |
| Weight                                     | 0.057      |
| Maximum diastolic blood pressure           | 0.040      |
| Height                                     | 0.037      |
| Minimum diastolic blood pressure           | 0.032      |
| Mean heart rate                            | 0.030      |
| Maximum systolic blood pressure            | 0.029      |
| Minimum diastolic blood pressure           | 0.028      |
| Maximum heart rate                         | 0.028      |
| Mean diastolic blood pressure              | 0.027      |
| Minimum heart rate                         | 0.025      |
| Mean systolic blood pressure               | 0.023      |
| Age                                        | 0.020      |

<sup>a</sup>Remaining predictor variables not shown had relative importance <0.01. The full list of variables and their associated importance values are available in the “Data Modeling using AoU Data” Python notebook in the *All of Us* workspace associated with this manuscript (“Systemic Disease and Glaucoma”).
